# Supplementary material
Source: Frontiers journal article supplement (https://www.frontiersin.org/articles/558055)
Supplement: Image_1.pdf [file Image_1.pdf]

## Supplementary Information

### Nitrogen-doped Oxygenated Molybdenum Phosphide as an Efficient Electrocatalyst for Hydrogen Evolution in Alkaline Media

*Muhammad Waqas Khan,<sup>a, b, 1</sup>, Suraj Loomba,<sup>a, 1</sup>, Rashad Ali,<sup>c</sup> Md Mohiuddin,<sup>a</sup> Ahmed Alluqmani,<sup>a</sup> Farjana Haque,<sup>a</sup> Yongkun Liu,<sup>d</sup> Rizwan Ur Rehman Sagar,<sup>e</sup> Ali Zavabeti,<sup>a, f</sup> Turki Alkathiri,<sup>a, g</sup> Babar Shabbir,<sup>h</sup> Jian Xian,<sup>c, i</sup> Jian Zhen Ou,<sup>a,\*</sup> Asif Mahmood,<sup>j,\*</sup> Nasir Mahmood<sup>a,\*</sup>*

<sup>a</sup> School of Engineering, RMIT University, 124 La Trobe Street, Melbourne, Victoria, 3001, Australia.

<sup>b</sup> Applied Porous Materials Unit, Commonwealth Scientific and Industrial Research Organisation (CSIRO), Clayton, VIC 3168, Australia

<sup>c</sup> School of Materials and Energy, University of Electronic Science and Technology of China, Chengdu, 611731, China

<sup>d</sup> College of Textile Science and Engineering (International Institute of Silk), Zhejiang Sci-Tech University, Hangzhou, 310018, PR China

<sup>e</sup> School of Materials Science and Engineering, Jiangxi University of Science and Technology, Jiangxi, 341000, PR China

<sup>f</sup> Department of Chemical Engineering, The University of Melbourne, Parkville, Victoria 3010, Australia

<sup>g</sup> School of Engineering, Albaha University, Albaha, Alaqiq 4781, Saudi Arabia

<sup>h</sup> Department of Materials Science and Engineering, ARC Centre of Excellence in Exciton Science, Monash University, Clayton VIC 3800, Australia.

<sup>i</sup> National Engineering Researching Centre of Electromagnetic Radiation Control Materials,  
State Key Laboratory of Electronic Thin Films and Integrated Devices, University of  
Electronic Science and Technology of China, Chengdu, 611731, China

<sup>j</sup> School of Chemical and Biomolecular Engineering, The University of Sydney,  
Darlington, Sydney, New South Wales, 2006, Australia

### Corresponding Authors

Dr. Jianzhen Ou: [jianzhen.ou@rmit.edu.au](mailto:jianzhen.ou@rmit.edu.au)

Dr. Asif Mahmood: [asif.mahmood@sydney.edu.au](mailto:asif.mahmood@sydney.edu.au)

Dr. Nasir Mahmood: [nasir.mahmood@rmit.edu.au](mailto:nasir.mahmood@rmit.edu.au)

<sup>l</sup>These two authors contributed equally to this article.

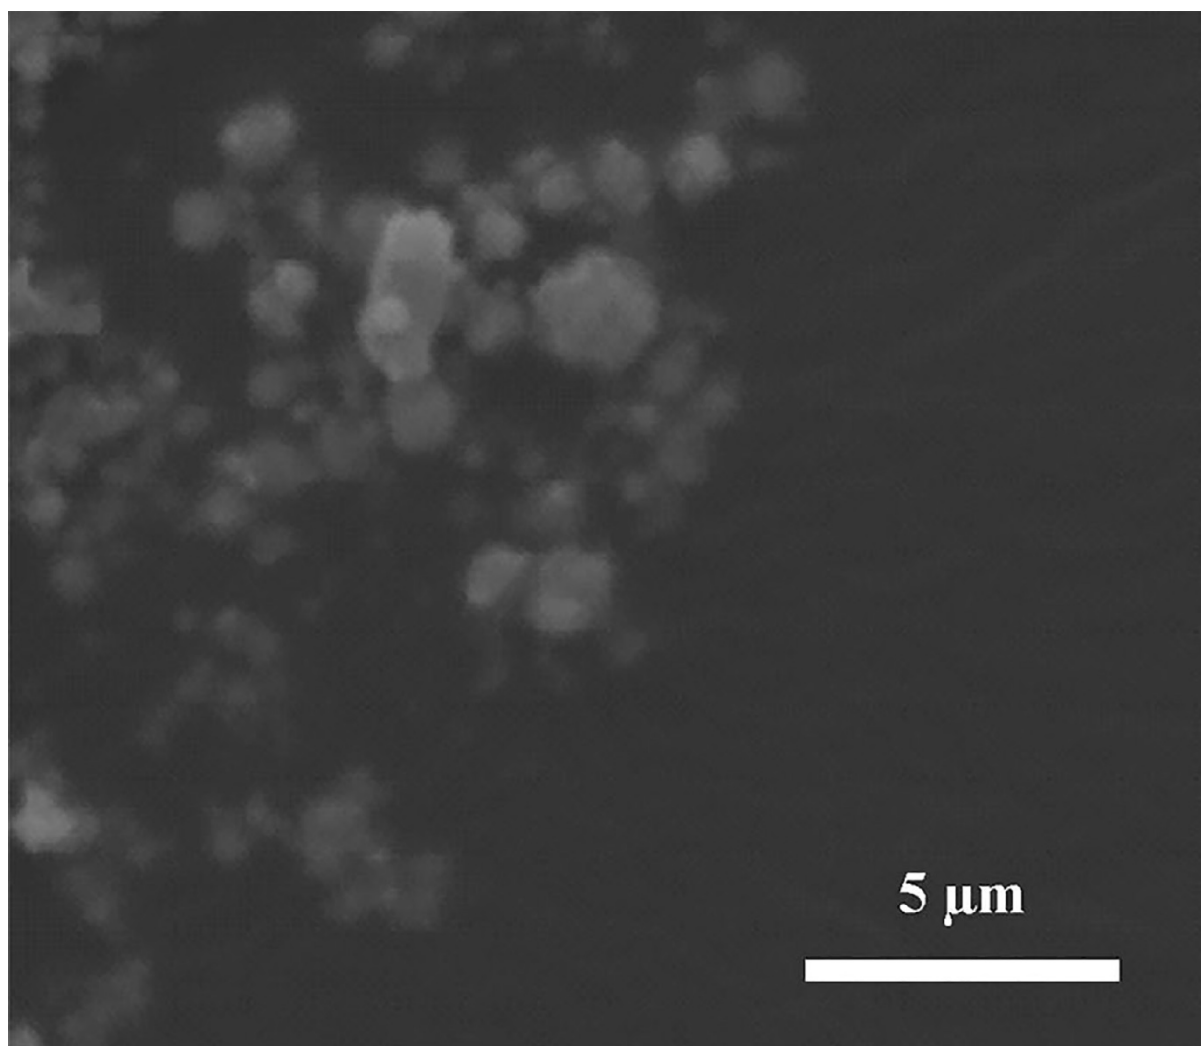

**Figure S1:** SEM micrograph of the N-MoP

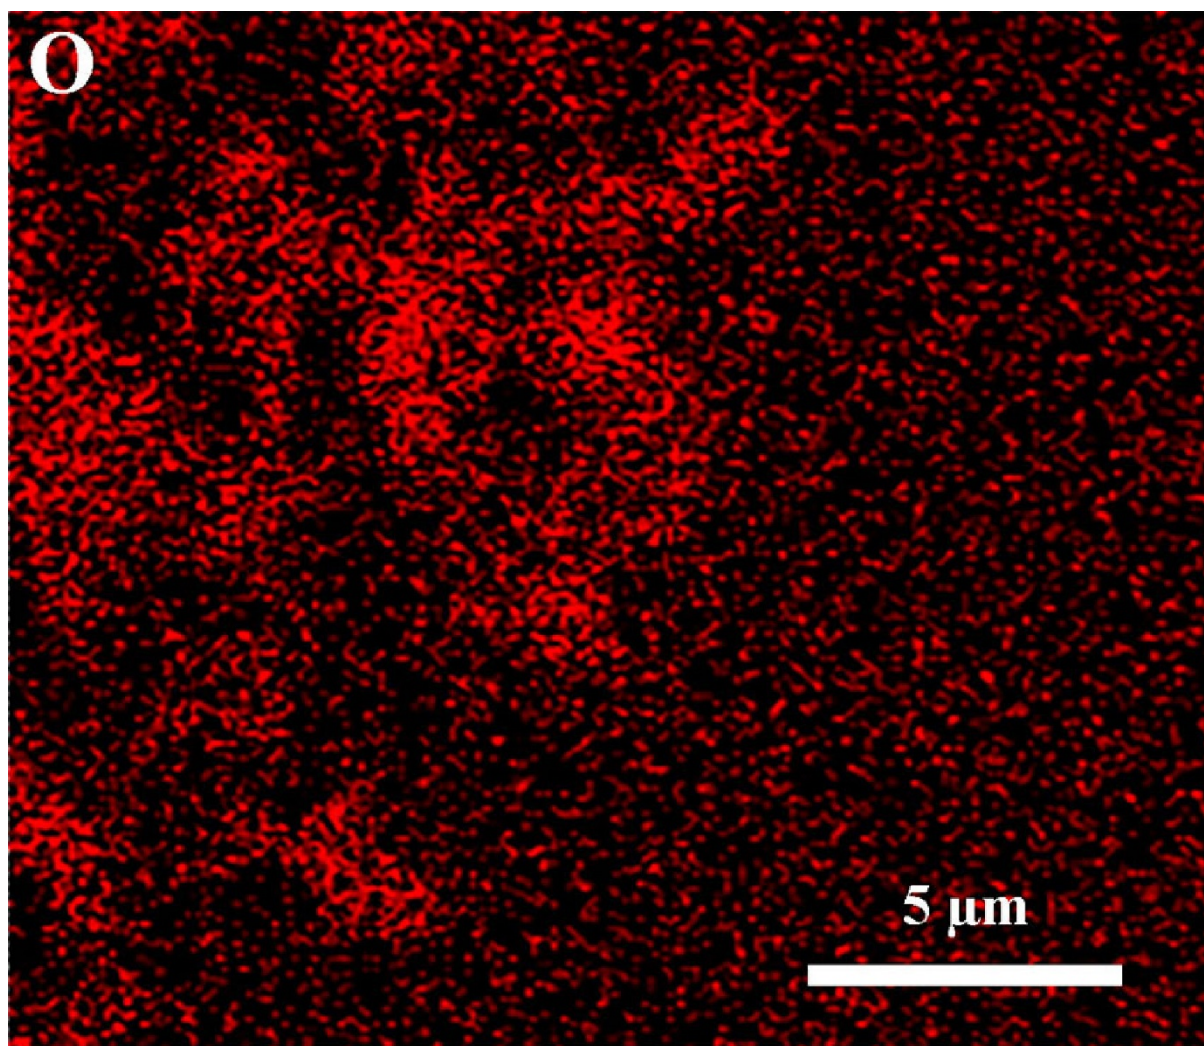

**Figure S2:** EDS mapping of O in the N-MoP

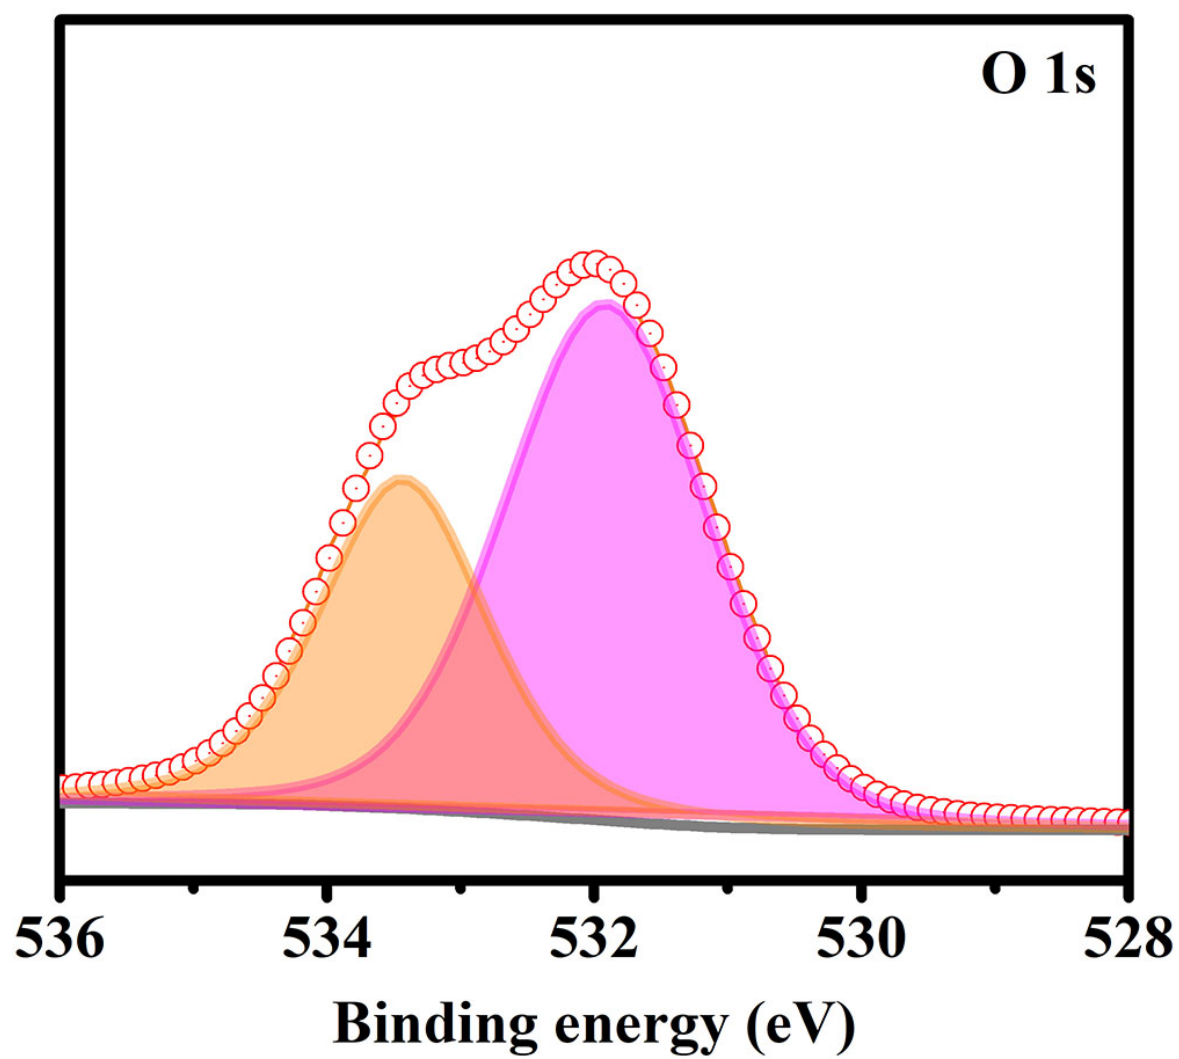

**Figure S3:** XPS spectra of O 1s for N-MoP
